# Supplementary material for: Self-assembly of [Cu3I2]- or [CuI]n-based (n = 2, 4, and ∞) coordination polymers from unsymmetrical bis(pyridyl) and in situ ligands: syntheses, structures, and properties
Source: Royal Society of Chemistry journal article supplement (doi:10.1039/c3ce41774c), 2013-11-01
Supplement: c3ce41774c.pdf [file c3ce41774c.pdf]

Electronic Supplementary Information for CrystEngComm

This journal is (c) The Royal Society of Chemistry 2013

Electronic Supplementary Information (ESI)

**Self-assembly of [Cu<sub>3</sub>I<sub>2</sub>]- or [CuI]<sub>n</sub>-based (n = 2, 4, and ∞)  
coordination polymers from unsymmetrical bis(pyridyl) and in  
situ ligands: synthesis, structures, and properties**

**Zhu-Yan Zhang, Zhao-Peng Deng, Xian-Fa Zhang, Li-Hua Huo, Hui Zhao and Shan Gao**

Electronic Supplementary Information for CrystEngComm

This journal is (c) The Royal Society of Chemistry 2013

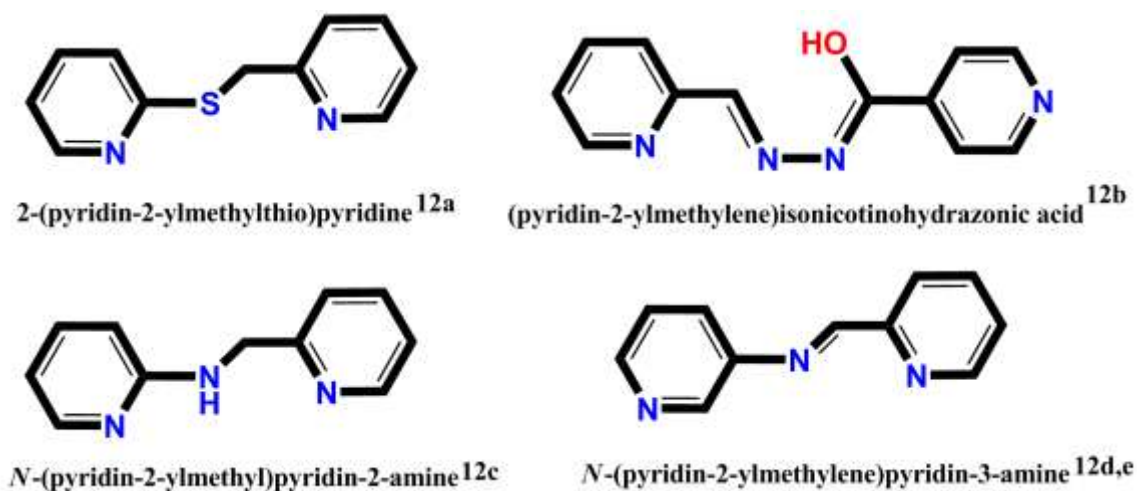

**Scheme S1** Schematic representation of the unsymmetrical bis(pyridyl) ligands in reported Cu(I) complexes.

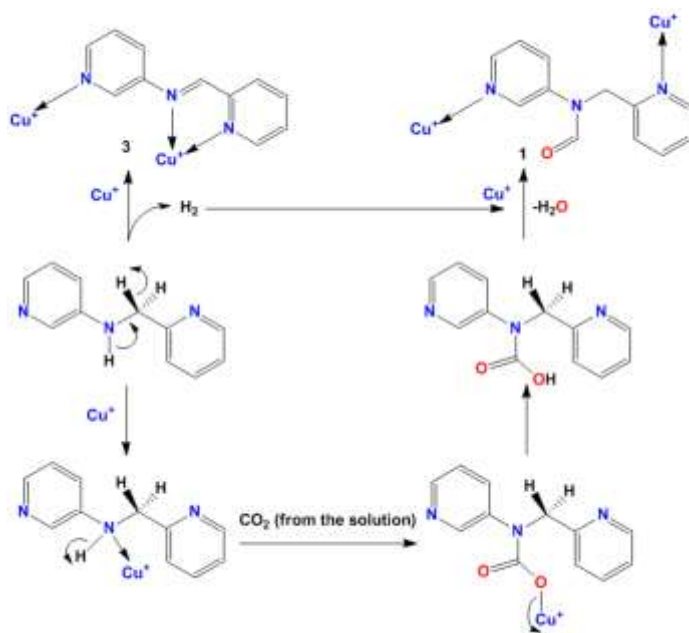

**Scheme S2** Proposed mechanism for the formation of complexes **1** and **3**.<sup>S1</sup>

## References

- S1 (a) J. Liu, C. Guo, Z. Zhang, T. Jiang, H. Liu, J. Song, H. Fan and B. Han, *Chem. Commun.*, 2010, **46**, 5770-5772; (b) B. Xu, R. J. Madix and C. M. Friend, *Chem. Eur. J.*, 2012, **18**, 2313-2318.

Electronic Supplementary Information for CrystEngComm

This journal is (c) The Royal Society of Chemistry 2013

### Disorder of complexes **2**, **4** and **5**

The acetonitrile of complex **2** is eliminated with SQUEEZE during resolution of the structure but added to total atom count. The free water molecule in complex **4** is disordered over two positions with the ratio of 0.55:0.45. In complex **5**, the ligand **L3** is disordered about the center of the aliphatic C-N bond. Meanwhile, the C and N atom in this aliphatic C-N bond have the same chance to occupy the two positions. Therefore, during the refinement, the C and N atom is refined with fifty percent occupancy in the two positions of aliphatic C-N bond.

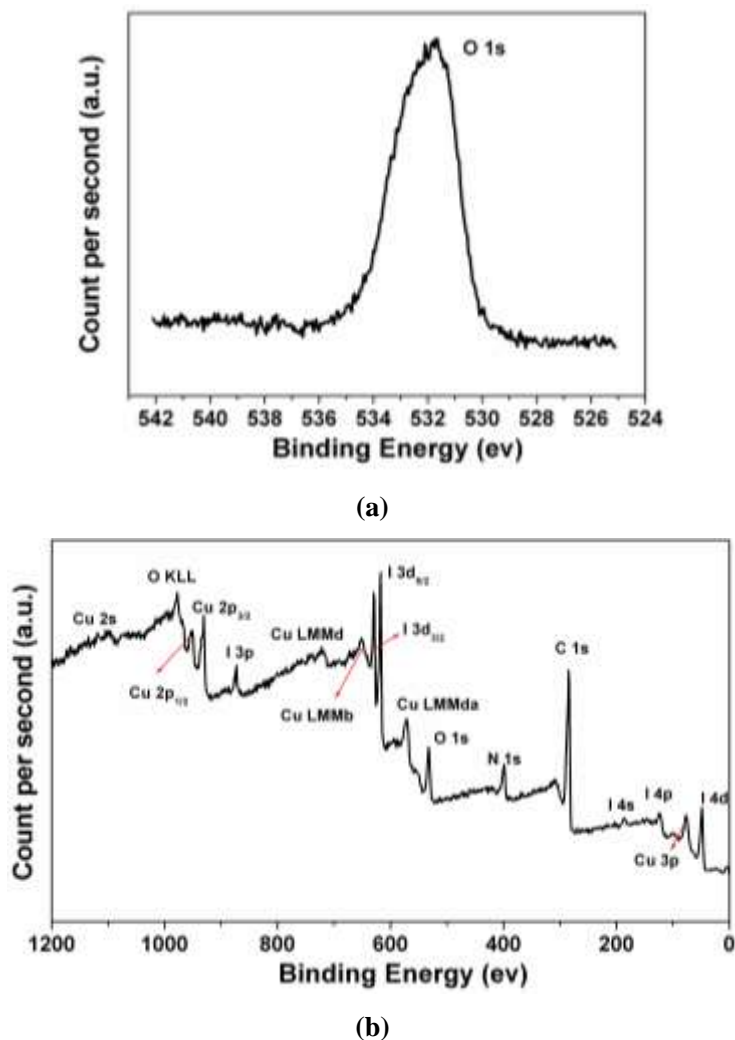

**Fig. S1** (a) XPS spectrum of **1** in the range corresponding to the O 1s level; (b) XPS spectrum of **1**.

Electronic Supplementary Information for CrystEngComm

This journal is (c) The Royal Society of Chemistry 2013

### Powder X-ray diffraction (PXRD)

Powder X-ray diffraction (PXRD) patterns for solid samples of **1-5** are measured at room temperature as illustrated in Fig. S2. The patterns are highly similar to their simulated ones (based on the single-crystal X-ray diffraction data), indicating that the single-crystal structures are really representative of the bulk of the corresponding samples.

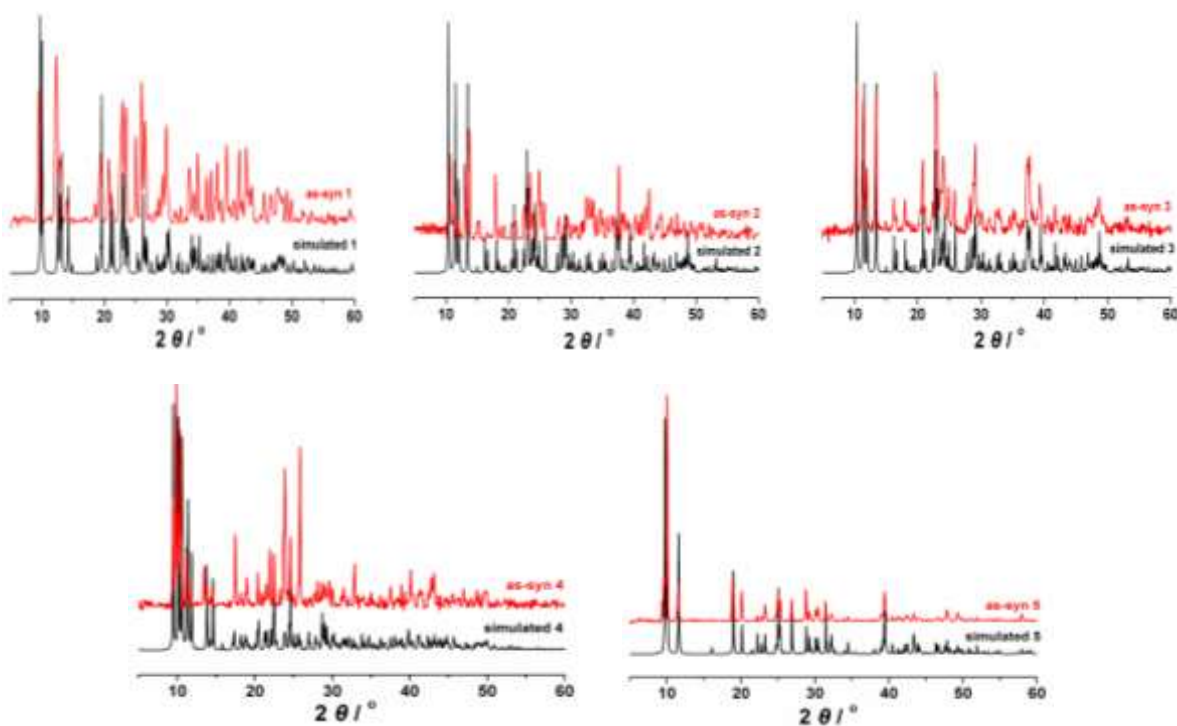

Fig. S2 PXRD patterns for 1-5.

Electronic Supplementary Information for CrystEngComm

This journal is (c) The Royal Society of Chemistry 2013

### Thermogravimetric analysis (TGA)

The thermal stabilities of **1-5** were analyzed on crystalline samples by thermogravimetric analyses (TGA) from room temperature to 900 °C at a rate of 10 °C min<sup>-1</sup> under N<sub>2</sub> atmosphere. As shown in Fig. S3, the TG curves indicated that **1** was stable up to ca. 120 °C and the initial weight loss in the temperature range 120-330 °C was due to the decomposition of **L1a** (obsd 52.59%, calcd 52.82%). Over the range 330-600 °C, the weight loss should correspond to the sublimation of iodine (obsd 31.48%, calcd 31.44%). The TG curve for **2** showed a minor weight loss in the temperature range 63-108 °C, which corresponded to the loss of acetonitrile molecule (obsd 3.41%, calcd 3.71%). Then, the **dmtrz** was decomposed in the temperature range 180-375 °C, with a weight loss of 45.02% (calcd 44.64%). Further weight loss of 34.64% in the temperature range 375-610 °C was consistent with the sublimation of iodine (calcd 34.42%). The first weight loss of **3** occurred in the temperature range 204-335 °C, corresponding to the decomposition of **L1b** (obsd 32.26%, calcd 32.48%). Then, the second weight loss of 45.31% in the temperature range 335-540 °C was consistent with the sublimation of iodine (calcd 44.99%). For **4**, the minor weight loss of 1.77% in the temperature range 60-85 °C was caused by the loss of free water molecule (calcd 1.57%). After that, the **L2** was decomposed in the temperature range 130-345 °C, with a weight loss of 31.86% (calcd 32.2%). Over the range 345-484 °C, the weight loss should correspond to the sublimation of iodine (obsd 44.21%, calcd 44.13%). The initial weight loss of **5** in the temperature range 160-376 °C was due to the decomposition of **L3** (obsd 32.61%, calcd 32.72%). Over the range 376-702 °C, the weight loss should correspond to the sublimation of iodine (obsd 44.69%, calcd 44.83%).

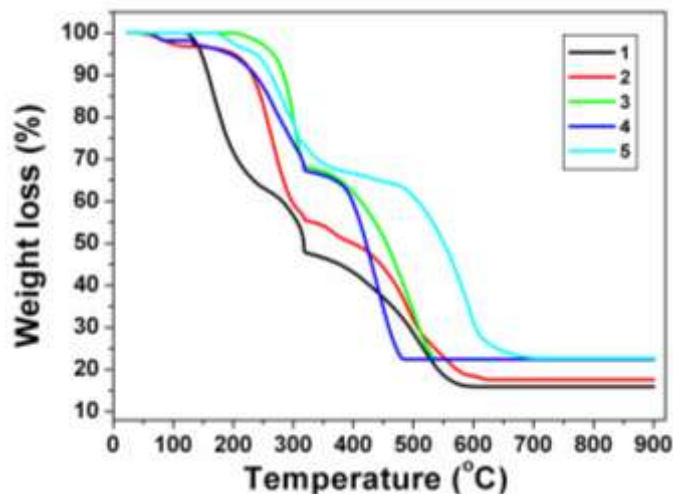

Fig. S3 TG curves of **1-5** at N<sub>2</sub> atmosphere.

Electronic Supplementary Information for CrystEngComm

This journal is (c) The Royal Society of Chemistry 2013

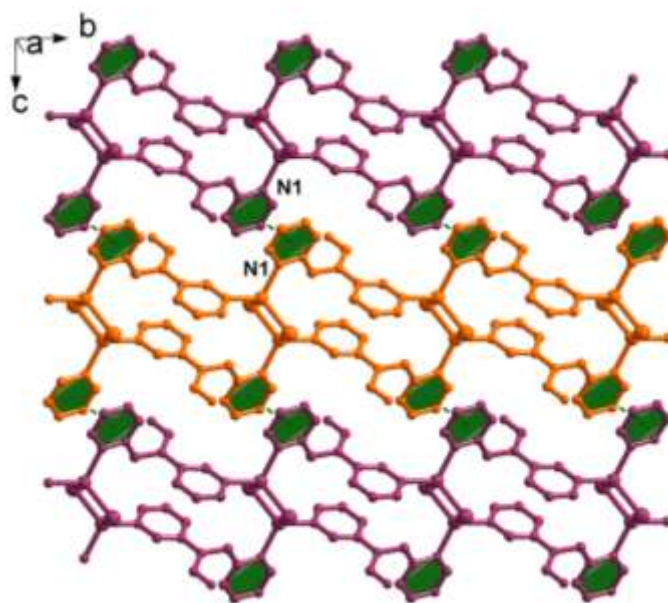

**Fig. S4** Layer structure of **1** extended by the  $\pi \cdots \pi$  interactions (green dashed lines). Orange and purple ball-and-stick modes represented different double chains.

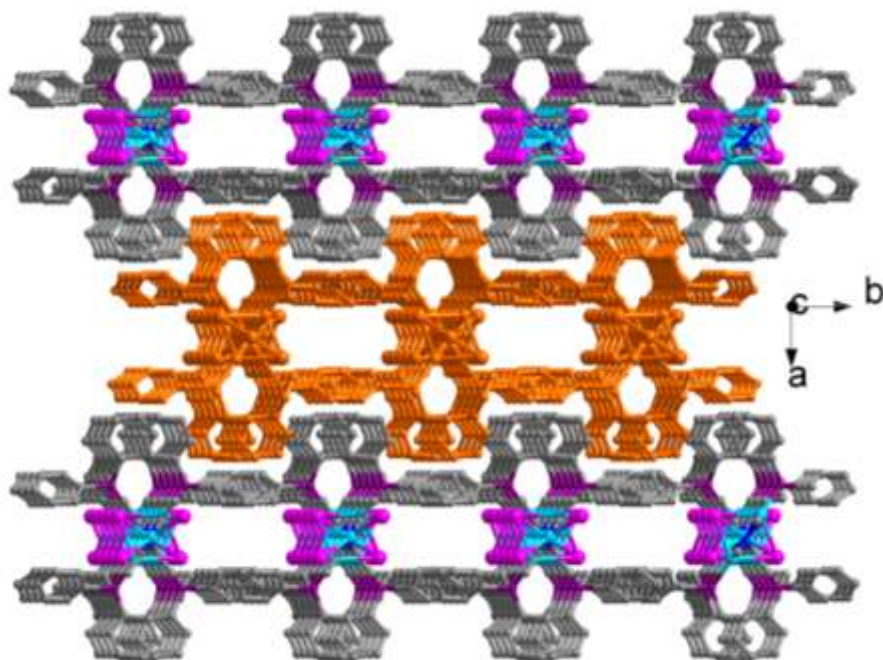

**Fig. S5** Double layer structure of **2** with the acetonitrile molecules were omitted for clarity.

Electronic Supplementary Information for CrystEngComm

This journal is (c) The Royal Society of Chemistry 2013

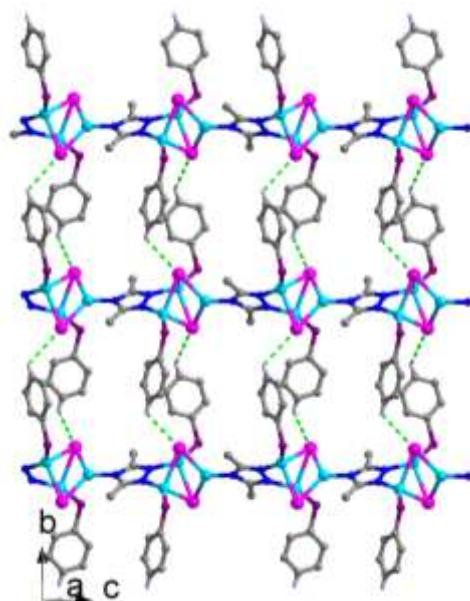

**Fig. S6** Layer structure of **2** extended by the C-H...I interactions (green dashed lines). The other two phenyl rings of the PPh<sub>3</sub> molecules were omitted for clarity.

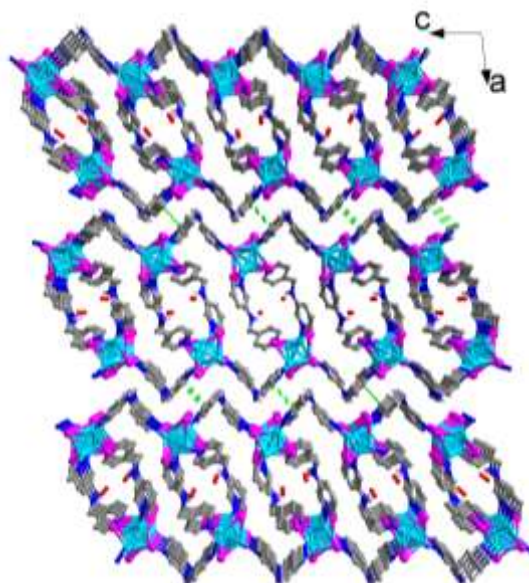

**Fig. S7** 3-D supramolecular architecture of **4** extended by the  $\pi \cdots \pi$  interactions (green dashed lines) with free water molecules encapsulated in the 1-D channels.

Electronic Supplementary Information for CrystEngComm

This journal is (c) The Royal Society of Chemistry 2013

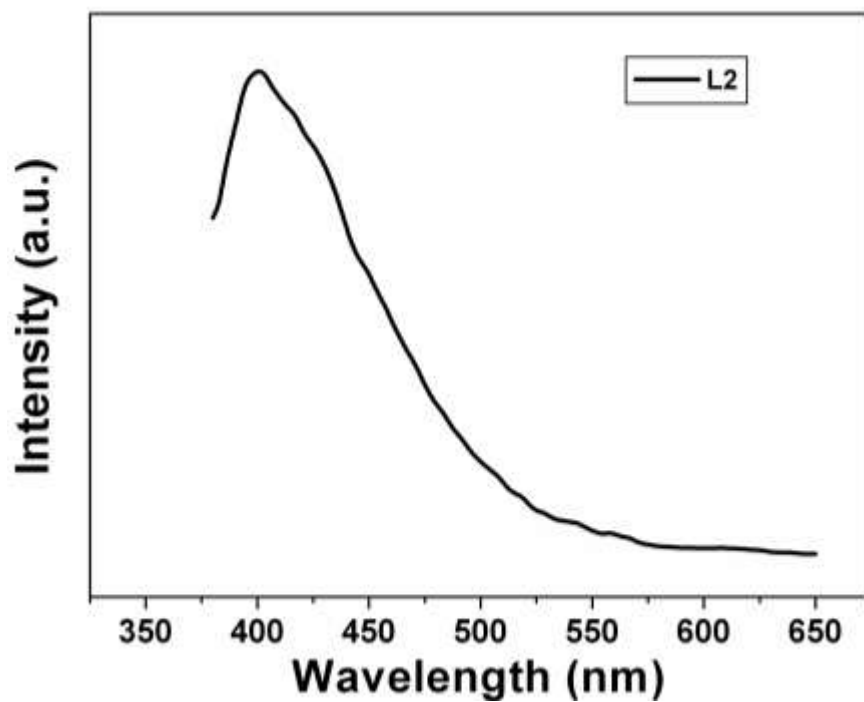

**Fig. S8** Emission spectrum of free ligand **L2** in solid state.



Electronic Supplementary Information for CrystEngComm

This journal is (c) The Royal Society of Chemistry 2013

**Table S1** Selected bond lengths for **1-5<sup>a</sup>**

|                          |            |                           |            |
|--------------------------|------------|---------------------------|------------|
| <b>1</b>                 |            |                           |            |
| Cu(1)-N(1)               | 2.078(7)   | Cu(1)-I(1) <sup>ii</sup>  | 2.6711(19) |
| Cu(1)-N(3) <sup>i</sup>  | 2.083(7)   | Cu(1)-Cu(1) <sup>ii</sup> | 2.717(3)   |
| Cu(1)-I(1)               | 2.6246(17) |                           |            |
| <b>2</b>                 |            |                           |            |
| I(1)-Cu(1)               | 2.8447(9)  | Cu(1)-Cu(2)               | 2.9027(6)  |
| Cu(1)-N(2) <sup>ii</sup> | 1.958(4)   | Cu(2)-N(1)                | 1.952(5)   |
| Cu(1)-P(1)               | 2.1934(5)  | Cu(2)-I(1) <sup>i</sup>   | 2.5671(6)  |
| Cu(1)-I(1) <sup>i</sup>  | 2.8520(6)  | I(1)-Cu(2)                | 2.5671(6)  |
| <b>3</b>                 |            |                           |            |
| I(1)-Cu(1)               | 2.6048(13) | Cu(1)-N(2)                | 2.119(7)   |
| I(1)-Cu(2)               | 2.6285(15) | Cu(1)-Cu(2) <sup>i</sup>  | 2.665(2)   |
| I(1)-Cu(2) <sup>i</sup>  | 2.7797(18) | Cu(2)-N(3) <sup>ii</sup>  | 2.049(7)   |
| I(2)-Cu(1)               | 2.5738(15) | Cu(2)-I(2) <sup>i</sup>   | 2.6777(15) |
| I(2)-Cu(2) <sup>i</sup>  | 2.6777(15) | Cu(2)-I(1) <sup>i</sup>   | 2.7797(18) |
| Cu(1)-N(1)               | 2.077(7)   |                           |            |
| <b>4</b>                 |            |                           |            |
| Cu(1)-N(1)               | 2.030(8)   | Cu(2)-I(3)                | 2.7261(16) |
| Cu(1)-Cu(3)              | 2.645(2)   | Cu(2)-Cu(4)               | 2.839(2)   |
| Cu(1)-Cu(4)              | 2.658(2)   | Cu(3)-N(3) <sup>i</sup>   | 2.013(9)   |
| Cu(1)-I(3)               | 2.6699(16) | Cu(3)-I(2)                | 2.6502(16) |
| Cu(1)-Cu(2)              | 2.674(2)   | Cu(3)-I(4)                | 2.6826(17) |
| Cu(1)-I(1)               | 2.6777(15) | Cu(3)-I(1)                | 2.7209(16) |
| Cu(1)-I(2)               | 2.7759(17) | Cu(3)-Cu(4)               | 2.818(2)   |
| Cu(2)-N(4)               | 2.028(8)   | Cu(4)-N(6) <sup>ii</sup>  | 2.042(8)   |
| Cu(2)-Cu(3)              | 2.618(2)   | Cu(4)-I(3)                | 2.6497(17) |
| Cu(2)-I(1)               | 2.7002(16) | Cu(4)-I(4)                | 2.6592(16) |
| Cu(2)-I(4)               | 2.7193(16) | Cu(4)-I(2)                | 2.7516(17) |
| <b>5</b>                 |            |                           |            |
| I(1)-Cu(1)               | 2.6497(9)  | Cu(1)-I(1) <sup>i</sup>   | 2.6846(11) |
| Cu(1)-N(1)               | 1.973(7)   | Cu(1)-I(1) <sup>iv</sup>  | 2.7016(9)  |

Cu(1)-N(3)<sup>iii</sup>                    2.07(4)                    Cu(1)-Cu(1)<sup>v</sup>                    2.751(2)

<sup>a</sup> Symmetry operations: **For 1**, i x,y-1,z; ii -x+1,-y,-z+1. **For 2**, i -x+3/2,-y+3/2,z; ii x,-y+3/2,z-1/2. **For 3**, i -x,-y+1,-z+1; ii x-1/2,-y+1/2,z+1/2. **For 4**, i x,-y+1,z-1/2; ii -x+1,y-1,-z+1/2. **For 5**, i -x+1,-y+1,-z+1; iii -x+1,y,-z+1/2; iv x,y-1,z; v -x+1,-y,-z+1.

---
